# Supplementary material for: Bimetal–Organic Framework-Derived CoMn@C Catalysts for Fischer–Tropsch Synthesis
Source: MDPI journal article supplement (doi:10.3390/catal13030633), 2023-03-22
Supplement: s1 [file s1]

# Bimetal–Organic Framework-Derived CoMn@C Catalysts for Fischer–Tropsch Synthesis

Linyan Yang, Yu Gao, Yupeng Guo, Zhengjia Li, Jie Cen, Nan Yao and Xiaonian Li \*

Institute of Industrial Catalysis, College of Chemical Engineering, Zhejiang University of Technology, Hangzhou 310014, China; yanglinyan2007@126.com (L.Y.); gaoyu899@163.com (Y.G.); guoyupeng997@163.com (Y.G.); lizhengjia@zjut.edu.cn (Z.L.); jcen@zjut.edu.cn (J.C.); ken Yao@zjut.edu.cn (N.Y.);

\* Correspondence: xnli@zjut.edu.cn (X.L.)

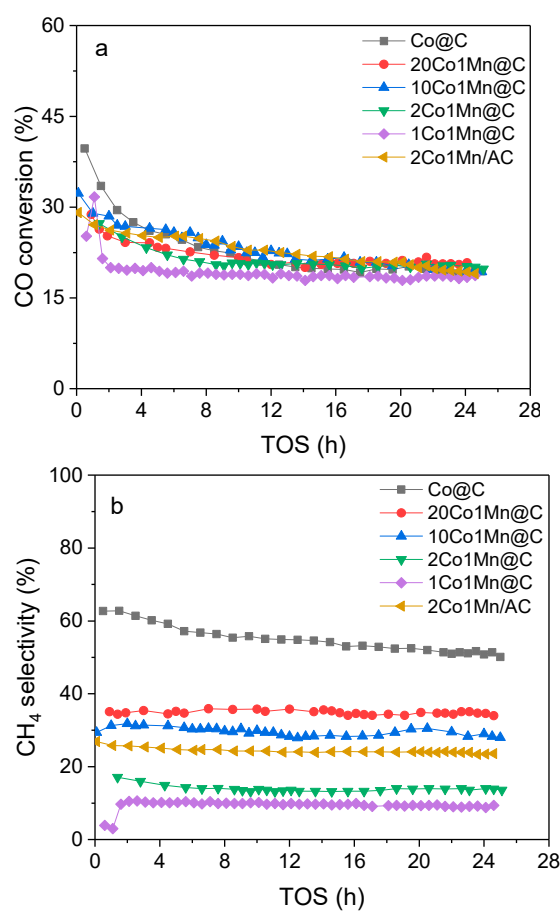

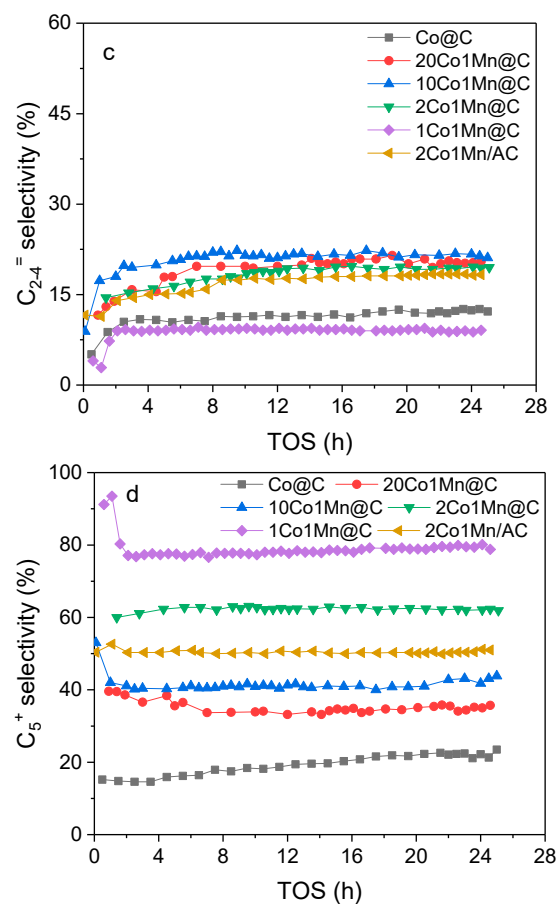

**Figure S1.** CO conversion (a), CH<sub>4</sub> (b), C<sub>2-4</sub>= (c), and C<sub>5</sub><sup>+</sup> selectivity (d) with time on stream (TOS) of the MOFs-derived and active carbon supported catalysts. Here, the GHSV = 5000 mL·g<sub>cat</sub><sup>-1</sup>·h<sup>-1</sup> for Co@C, GHSV = 8000 mL·g<sub>cat</sub><sup>-1</sup>·h<sup>-1</sup> for 20Co1Mn@C, 10Co1Mn@C and 2Co1Mn@C, GHSV = 2400 mL·g<sub>cat</sub><sup>-1</sup>·h<sup>-1</sup> for 1Co1Mn@C, GHSV = 4500 mL·g<sub>cat</sub><sup>-1</sup>·h<sup>-1</sup> for 2Co1Mn/AC. (235 °C, 1 bar, and H<sub>2</sub>/CO = 2).

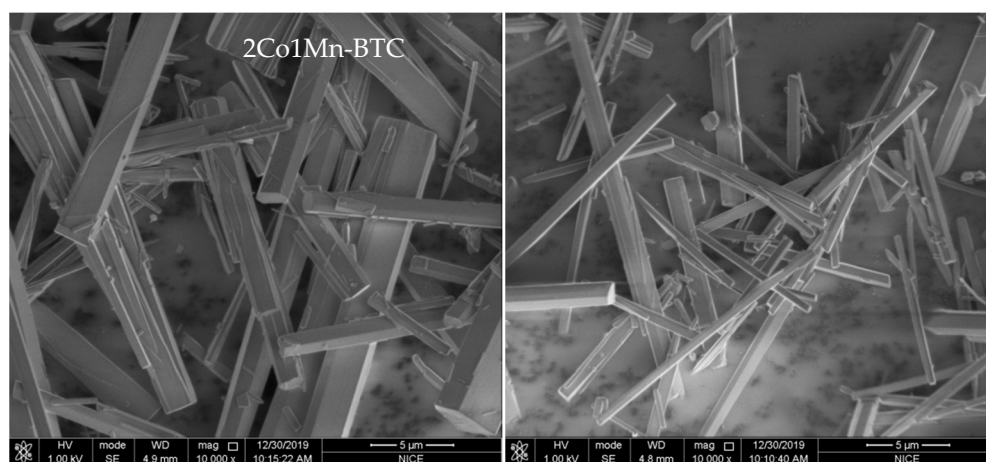

**Figure S2.** The SEM images for Co-BTC and 2Co1Mn-BTC.

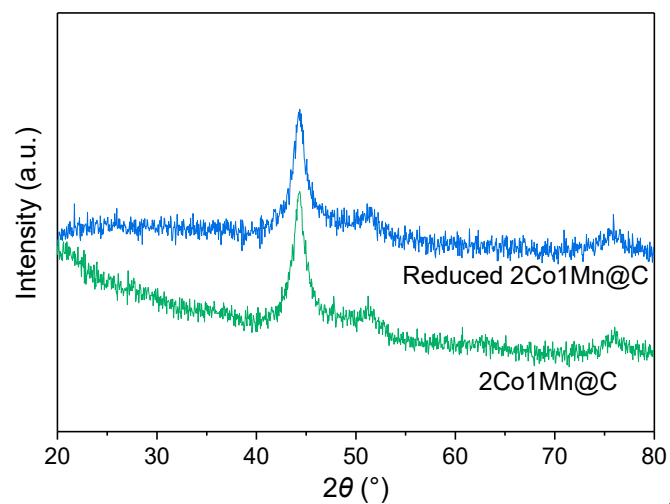

**Figure S3.** The XRD patterns for 2Co1Mn@C and reduced 2Co1Mn@C (reduction condition: 350 °C for 6 h under 10% $\text{H}_2$ /Ar).

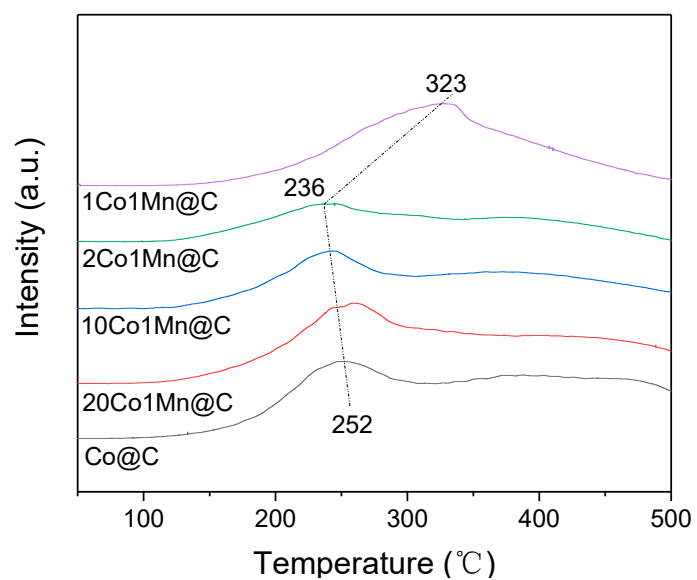

**Figure S4.** The H<sub>2</sub>-TPR profiles for MOFs-derived catalysts.

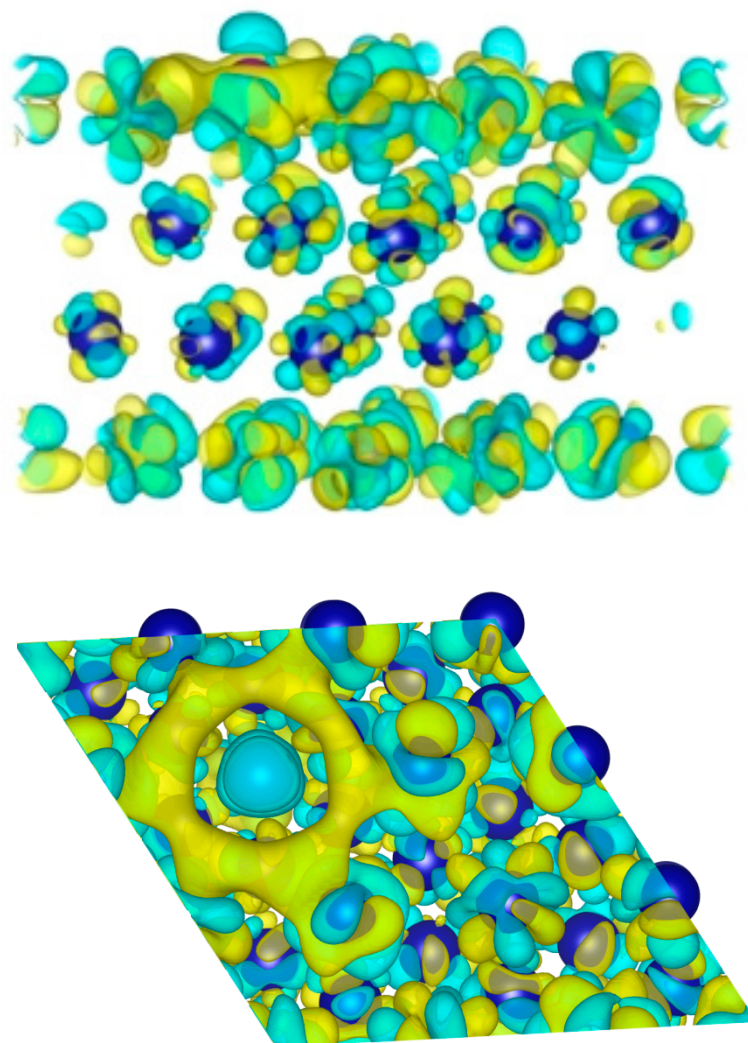

**Figure S5.** Calculated electron distribution of Mn-in-Co(111), side view (top) and top view (bottom). Blue and purple spheres represent Co and Mn, respectively. The cyan and yellow colors represent the depletion and accumulation of charge.

**Table S1.** Surface elemental composition and atomic ratio measured by XPS, and Mn/Co molar ratio calculated by ICP-MS.

| Sample    | Element content (at%) <sup>a</sup> |       |       |       | Mn/Co molar ratio <sup>a</sup> | Content (wt.%) <sup>b</sup> |      | Mn/Co molar ratio <sup>b</sup> |
|-----------|------------------------------------|-------|-------|-------|--------------------------------|-----------------------------|------|--------------------------------|
|           | Co 2p                              | Mn 2p | C 1s  | O 1s  |                                | Mn                          | Co   |                                |
| Co@C      | 4.90                               | -     | 84.08 | 11.02 | 0.0                            | -                           | 57.4 | 0.0                            |
| 20Co1Mn@C | 5.86                               | 0.57  | 81.87 | 11.69 | 0.10                           | 1.7                         | 52.7 | 0.03                           |
| 10Co1Mn@C | 4.87                               | 0.82  | 83.51 | 10.80 | 0.17                           | 3.2                         | 49.9 | 0.07                           |
| 2Co1Mn@C  | 3.76                               | 2.09  | 79.08 | 15.07 | 0.56                           | 11.6                        | 40.0 | 0.31                           |
| 1Co1Mn@C  | 4.08                               | 2.89  | 76.85 | 16.18 | 0.71                           | 15.4                        | 33.0 | 0.50                           |

a: XPS result.

b: ICP-MS result.

**Table S2.** Surface area, crystallite sizes calculated by Scherrer equation and TOF of MOFs-derived catalysts with different Mn/Co molar ratio.

| Sample    | S <sub>BET</sub> (m <sup>2</sup> /g) | Crystallite size (nm) | TOF (10 <sup>-3</sup> s <sup>-1</sup> ) |
|-----------|--------------------------------------|-----------------------|-----------------------------------------|
| Co@C      | 169.7                                | 8.6                   | 3.48                                    |
| 20Co1Mn@C | 141.0                                | 7.4                   | 5.26                                    |
| 10Co1Mn@C | 148.0                                | 7.8                   | 5.77                                    |
| 2Co1Mn@C  | 125.5                                | 7.3                   | 6.91                                    |
| 1Co1Mn@C  | 109.2                                | 8.9                   | -                                       |
